# Supplementary material
Source: MDPI journal article supplement (https://www.mdpi.com/search?q=molecules-24-03278)
Supplement: s001 [file molecules-24-03278-s001.pdf]

## Supplementary Materials:

### Captions

**Fig. S1.** ESI-MS<sup>n</sup> spectra of monohydroxyl-tetramethoxyflavones (**M0**, **M9-M10**) in positive ion mode.

(A) MS<sup>2</sup> spectrum of **M0**; (B) MS<sup>3</sup> spectrum of **M0**;

(C) MS<sup>2</sup> spectrum of **M9**; (D) MS<sup>2</sup> spectrum of **M10**

**Fig. S2.** ESI-MS<sup>n</sup> spectra of dihydroxyl-triamethoxyflavone (**M5-M7**) in negative ion mode.

(A) MS<sup>2</sup> spectrum of **M5**; (B) MS<sup>3</sup> spectrum of **M5**;

(C) MS<sup>2</sup> spectrum of **M6**; (D) MS<sup>2</sup> spectrum of **M7**

**Fig. S3.** ESI-MS<sup>n</sup> spectra of monohydroxyl-tetramethoxyflavanones (**M14-M15**) in positive ion.

(A) MS<sup>2</sup> spectrum of **M14**; (B) MS<sup>3</sup> spectrum of **M14**;

(C) MS<sup>2</sup> spectrum of **M15**; (D) MS<sup>3</sup> spectrum of **M15**

**Fig. S4.** ESI-MS<sup>n</sup> spectra of dihydroxyl- tetramethoxychalcone (**M34-M37**) in positive ion mode.

(A) MS<sup>2</sup> spectrum of **M34**; (B) MS<sup>2</sup> spectrum of **M35**;

(C) MS<sup>2</sup> spectrum of **M36**; (D) MS<sup>2</sup> spectrum of **M37**

**Fig. S5.** ESI-MS<sup>n</sup> spectra of conjugate-metabolites (**M72**, **M78**) in negative ion mode.

(A) MS<sup>2</sup> spectrum of **M72**; (B) MS<sup>3</sup> spectrum of **M72**;

(C) MS<sup>2</sup> spectrum of **M78**; (D) MS<sup>3</sup> spectrum of **M78**

**Table S1.** Summary of HTF metabolites numbers of substituent groups in rats urine and plasma.

**Table S2.** Template for searching for these metabolites and their derivatives from metabolic reactions.

**Table S3.** Summary of HTF metabolites based on DMC

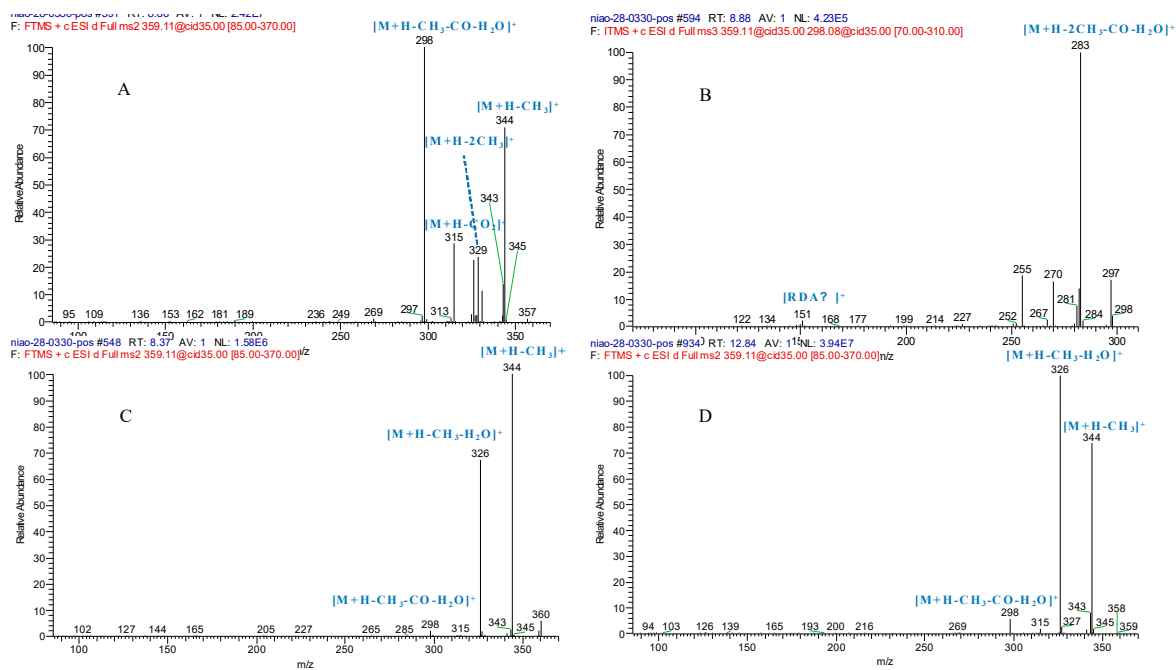

**Fig.S1.** ESI-MS<sup>n</sup> spectra of monohydroxyl-tetramethoxyflavones (**M0**, **M9-M10**) in positive ion mode.

(A)MS<sup>2</sup> spectrum of **M0**; (B) MS<sup>3</sup> spectrum of **M0**;

(C) MS<sup>2</sup> spectrum of **M9**; (D) MS<sup>2</sup> spectrum of **M10**

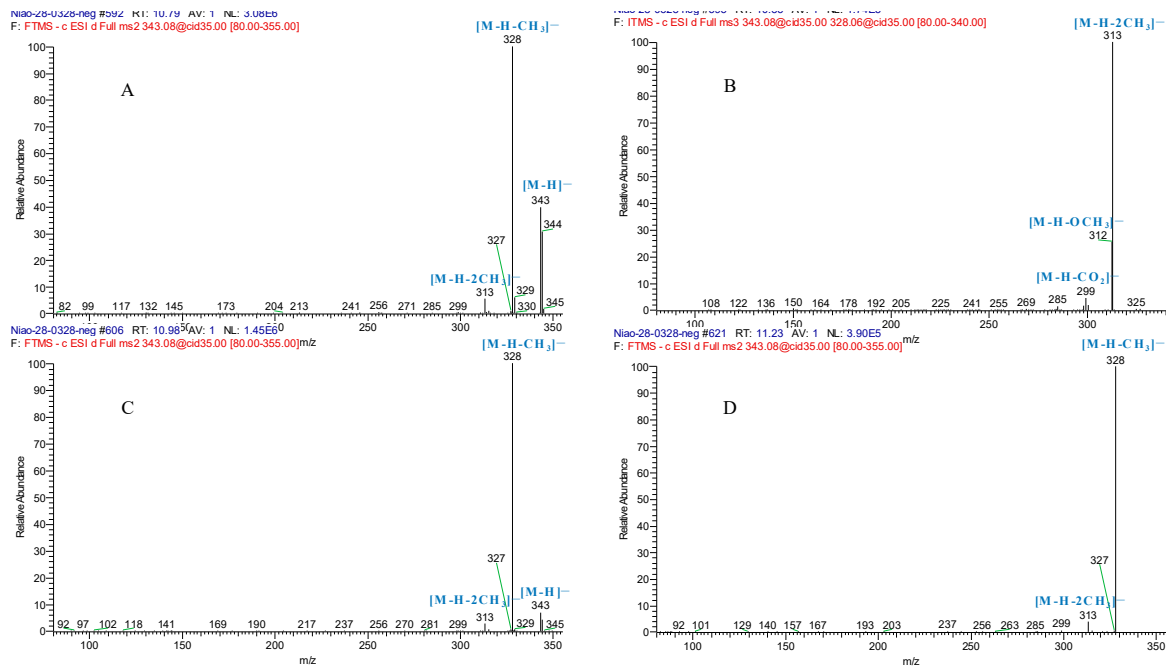

**Fig. S2.** ESI-MS<sup>n</sup> spectra of dihydroxyl-triamethoxyflavone (**M5-M7**) in negative ion mode.  
 (A) MS<sup>2</sup> spectrum of **M5**; (B) MS<sup>3</sup> spectrum of **M5**;  
 (C) MS<sup>2</sup> spectrum of **M6**; (D) MS<sup>2</sup> spectrum of **M7**

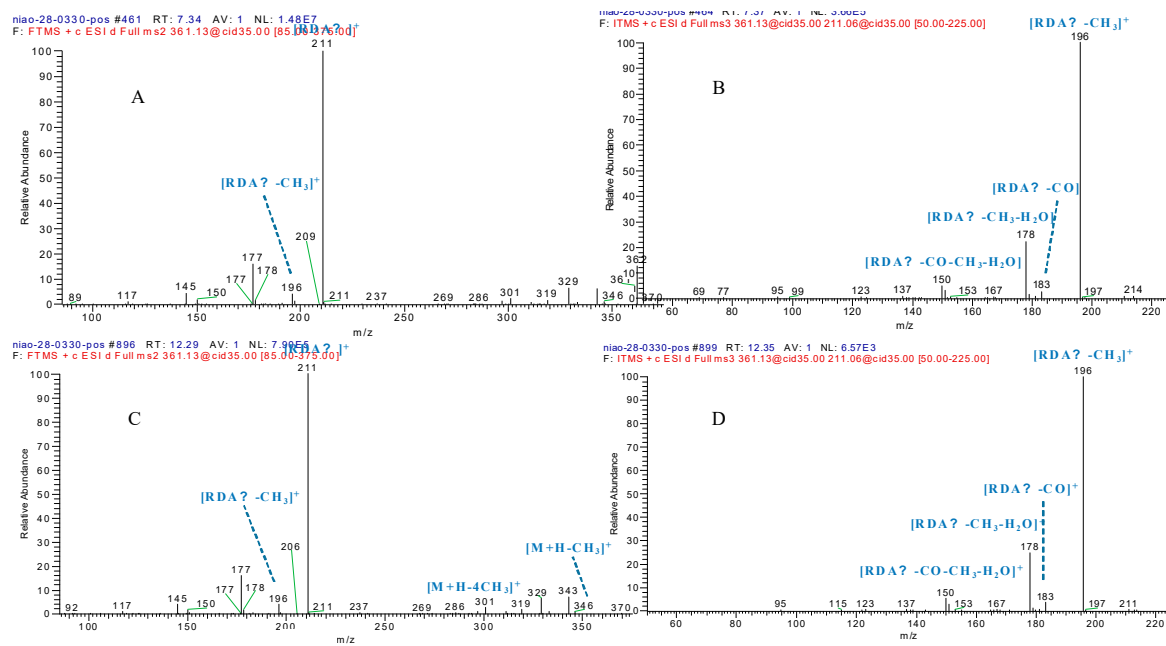

**Fig. S3.** ESI-MS<sup>n</sup> spectra of monohydroxyl-tetramethoxyflavones (M14-M15) in positive ion  
 (A) MS<sup>2</sup> spectrum of M14; (B) MS<sup>3</sup> spectrum of M14;  
 (C) MS<sup>2</sup> spectrum of M15; (D) MS<sup>3</sup> spectrum of M15

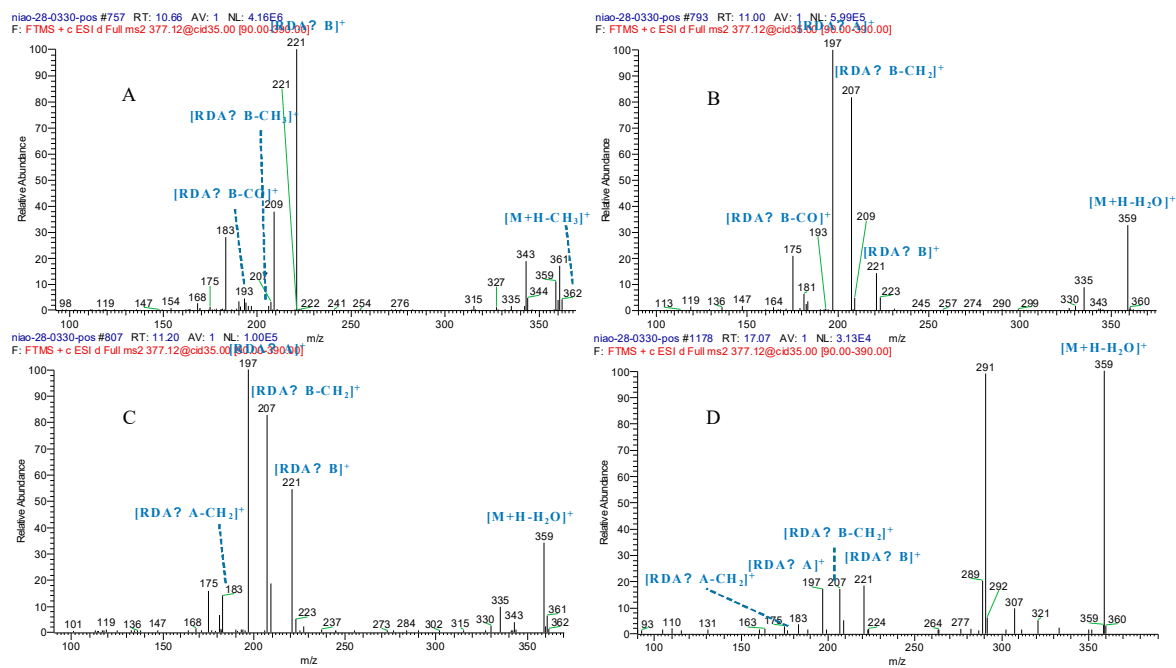

**Fig. S4.** ESI-MS<sup>n</sup> spectra of dihydroxyl- tetramethoxychalcone (**M34-M37**) in positive ion mode.

- (A) MS<sup>2</sup> spectrum of **M34**; (B) MS<sup>2</sup> spectrum of **M35**;  
 (C) MS<sup>2</sup> spectrum of **M36**; (D) MS<sup>2</sup> spectrum of **M37**

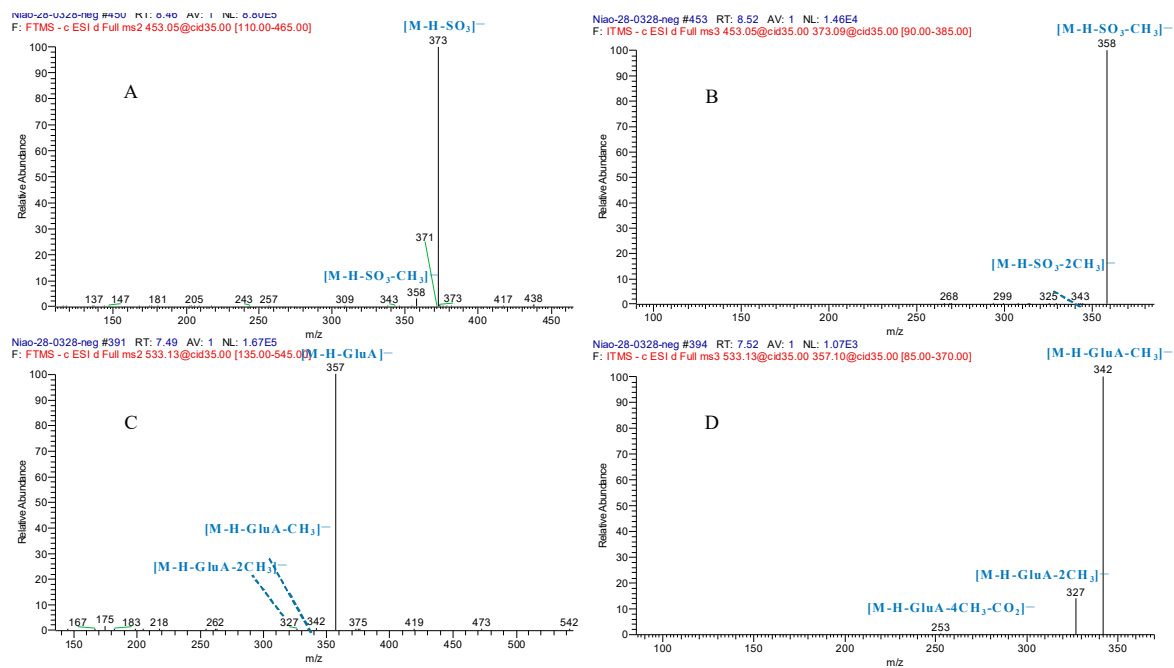

**Fig. S5.** ESI-MS<sup>n</sup> spectra of conjugate-metabolites (**M72**, **M78**) in negative ion mode.

(A) MS<sup>2</sup> spectrum of **M72**; (B) MS<sup>3</sup> spectrum of **M72**;

(C) MS<sup>2</sup> spectrum of **M78**; (D) MS<sup>3</sup> spectrum of **M78**

**Table S1.** Summary of HTF metabolites numbers of substituent groups in rats urine and plasma.

| Peak       | -OH | -OCH <sub>3</sub> | Urine | Plasma | Peak       | -OH | -OCH <sub>3</sub> | Urine | Plasma |
|------------|-----|-------------------|-------|--------|------------|-----|-------------------|-------|--------|
| <b>M0</b>  | 1   | 4                 | +     | +      | <b>M44</b> | 1   | 5                 | -     | +      |
| <b>M1</b>  | 3   | 2                 | +     | +      | <b>M45</b> | 1   | 5                 | +     | +      |
| <b>M2</b>  | 3   | 2                 | +     | -      | <b>M46</b> | 1   | 5                 | -     | +      |
| <b>M3</b>  | 3   | 2                 | +     | +      | <b>M47</b> | 1   | 5                 | -     | +      |
| <b>M4</b>  | 3   | 2                 | -     | +      | <b>M48</b> | 1   | 5                 | -     | +      |
| <b>M5</b>  | 2   | 3                 | +     | +      | <b>M49</b> | 1   | 5                 | -     | +      |
| <b>M6</b>  | 2   | 3                 | +     | +      | <b>M50</b> | 1   | 5                 | -     | +      |
| <b>M7</b>  | 2   | 3                 | +     | -      | <b>M51</b> | 1   | 5                 | +     | +      |
| <b>M8</b>  | 2   | 3                 | -     | +      | <b>M52</b> | 1   | 5                 | +     | +      |
| <b>M9</b>  | 1   | 4                 | +     | +      | <b>M53</b> | 1   | 5                 | +     | +      |
| <b>M10</b> | 1   | 4                 | +     | +      | <b>M54</b> | 1   | 5                 | -     | +      |
| <b>M11</b> | 3   | 3                 | -     | +      | <b>M55</b> | 1   | 5                 | +     | +      |
| <b>M12</b> | 1   | 5                 | +     | +      | <b>M56</b> | 1   | 5                 | +     | +      |
| <b>M13</b> | 1   | 5                 | +     | -      | <b>M57</b> | 1   | 5                 | +     | +      |
| <b>M14</b> | 1   | 4                 | +     | +      | <b>M58</b> | 1   | 5                 | +     | +      |
| <b>M15</b> | 1   | 4                 | -     | +      | <b>M59</b> | 1   | 5                 | +     | +      |
| <b>M16</b> | 3   | 3                 | -     | +      | <b>M60</b> | 1   | 5                 | -     | +      |
| <b>M17</b> | 3   | 3                 | -     | +      | <b>M61</b> | 1   | 6                 | +     | +      |

|            |   |   |   |   |            |   |   |   |   |
|------------|---|---|---|---|------------|---|---|---|---|
| <b>M18</b> | 3 | 3 | - | + | <b>M62</b> | 1 | 6 | - | + |
| <b>M19</b> | 3 | 3 | - | + | <b>M63</b> | 1 | 6 | + | + |
| <b>M20</b> | 0 | 5 | + | + | <b>M64</b> | 1 | 6 | - | + |
| <b>M21</b> | 0 | 5 | + | - | <b>M65</b> | 1 | 6 | - | + |
| <b>M22</b> | 0 | 5 | + | - | <b>M66</b> | 3 | 4 | + | + |
| <b>M23</b> | 0 | 5 | - | + | <b>M67</b> | 3 | 4 | + | + |
| <b>M24</b> | 2 | 4 | - | + | <b>M68</b> | 3 | 4 | + | + |
| <b>M25</b> | 2 | 4 | - | + | <b>M69</b> | 0 | 6 | + | + |
| <b>M26</b> | 2 | 4 | - | + | <b>M70</b> | 0 | 6 | + | + |
| <b>M27</b> | 2 | 4 | + | + | <b>M71</b> | 0 | 6 | + | - |
| <b>M28</b> | 2 | 4 | - | + | <b>M72</b> | 0 | 4 | - | + |
| <b>M29</b> | 2 | 4 | - | + | <b>M73</b> | 0 | 5 | + | + |
| <b>M30</b> | 2 | 4 | - | + | <b>M74</b> | 0 | 5 | + | + |
| <b>M31</b> | 0 | 5 | - | + | <b>M75</b> | 0 | 5 | + | + |
| <b>M32</b> | 2 | 4 | + | + | <b>M76</b> | 0 | 5 | - | + |
| <b>M33</b> | 2 | 4 | + | + | <b>M77</b> | 1 | 3 | - | + |
| <b>M34</b> | 2 | 4 | + | + | <b>M78</b> | 0 | 4 | + | + |
| <b>M35</b> | 2 | 4 | - | + | <b>M79</b> | 0 | 4 | + | + |
| <b>M36</b> | 2 | 4 | - | + | <b>M80</b> | 1 | 4 | - | + |
| <b>M37</b> | 2 | 4 | - | + | <b>M81</b> | 1 | 4 | - | + |
| <b>M38</b> | 1 | 5 | + | + | <b>M82</b> | 1 | 4 | + | + |
| <b>M39</b> | 1 | 5 | + | + | <b>M83</b> | 0 | 5 | + | + |



---

|            |   |   |   |   |            |   |   |   |   |
|------------|---|---|---|---|------------|---|---|---|---|
| <b>M40</b> | 1 | 5 | + | + | <b>M84</b> | 0 | 5 | + | + |
| <b>M41</b> | 1 | 5 | + | + | <b>M85</b> | 0 | 5 | + | + |
| <b>M42</b> | 1 | 5 | + | - | <b>M86</b> | 0 | 5 | + | + |
| <b>M43</b> | 1 | 5 | + | + |            |   |   |   |   |

---

**Table S2.** Template for searching for these metabolites and their derivatives from metabolic reactions.

| Biotransformation reaction               | Molecular formula change | Mass Shift |
|------------------------------------------|--------------------------|------------|
| $R-CH_2C_6H_5 \rightarrow R-H$           | $-C_7H_6$                | -90.0468   |
| $R-^{79}Br \rightarrow R-H$              | $-Br+H$                  | -77.9104   |
| $R-CF_3 \rightarrow R-H$                 | $-CF_3+H$                | -67.9874   |
| $2R-^{35}Cl_2 \rightarrow R-H$           | $-Cl_2+H_2$              | -67.9222   |
| $R-^{79}Br \rightarrow R-OH$             | $-Br+OH$                 | -61.9156   |
| $R-C(CH_3)_3 \rightarrow R-H$            | $-C_4H_8$                | -56.0624   |
| $R-ONO_2 \rightarrow R-OH$               | $-NO_2+H$                | -44.9851   |
| $R-COOH \rightarrow R-H$                 | $-CO_2$                  | -43.9898   |
| $R-CH(CH_3)_2 \rightarrow R-H$           | $-C_3H_6$                | -42.0468   |
| $R-C(CH_3)_3 \rightarrow R-OH$           | $-C_4H_8+O$              | -40.0675   |
| $2R-F_2 \rightarrow R-H$                 | $-F_2+H_2$               | -35.9811   |
| $R-^{35}Cl \rightarrow R-H$              | $-Cl+H$                  | -33.9611   |
| $R-CH_2OH \rightarrow R-H$               | $-CH_2O$                 | -30.0106   |
| $R-NO_2 \rightarrow R-NH_2$              | $-O_2+H_2$               | -29.9742   |
| $R-CH_2OCH_2CH_2CH_3 \rightarrow R-COOH$ | $-C_3H_8+O$              | -28.0675   |
| $R-C_2H_5 \rightarrow R-H$               | $-C_2H_4$                | -28.0312   |
| $R-CO-R' \rightarrow R-R'$               | $-CO$                    | -27.9949   |
| $R-CH(CH_3)_2 \rightarrow R-OH$          | $-C_3H_6+O$              | -26.0519   |
| $R-CH=N-OH \rightarrow R-CN$             | $-H_2O$                  | -18.0105   |
| $R-F \rightarrow R-H$                    | $-F+H$                   | -17.9906   |
| $R-^{35}Cl \rightarrow R-OH$             | $-Cl+OH$                 | -17.9662   |
| $RR'S=O \rightarrow R-S-R'$              | $-O$                     | -15.9949   |
| $R-NHNHR'C=S \rightarrow R-NHNHR'C=O$    | $-S+O$                   | -15.9772   |
| $R-CH_2OCH_2CH_3 \rightarrow R-COOH$     | $-C_2H_6+O$              | -14.0519   |
| $R-CH_3 \rightarrow R-H$                 | $-CH_2$                  | -14.0157   |
| $R-C(CH_3)_3 \rightarrow R-COOH$         | $-C_3H_8+O_2$            | -12.0726   |
| $R-CH_2CH_3 \rightarrow R-OH$            | $-C_2H_4+O$              | -12.0363   |

|                                                         |                        |           |
|---------------------------------------------------------|------------------------|-----------|
| $R-CH_2-CH_2-CH_2-CH_2-R' \rightarrow R-CH=CH-CH=CH-R'$ | $-H_4$                 | -4.0314   |
| $R-F \rightarrow R-OH$                                  | $-F+OH$                | -1.9957   |
| $R-CHNH_2-R' \rightarrow R-CO-R'$                       | $-NH_3+O$              | -1.0316   |
| $R-CH_2OCH_3 \rightarrow R-COOH$                        | $-CH_4+O$              | -0.0365   |
| $R-CH_2-NH_2 \rightarrow R-CH_2-OH$                     | $-NH+O$                | +0.984    |
| $R-CH(CH_3)_2 \rightarrow R-COOH$                       | $-C_2H_6+O_2$          | +1.943    |
| $R-CH_3 \rightarrow R-OH$                               | $-CH_2+O$              | +1.9792   |
| $R-CO-R' \rightarrow R-CHOH-R'$                         | $+H_2$                 | +2.0157   |
| $R-CH_2-R' \rightarrow R-C(O)-R'$                       | $-H_2+O$               | +13.9792  |
| $R-XH \rightarrow R-X-CH_2(X=N,O,S)$                    | $+CH_2$                | +15.9586  |
| $R-CH_2CH_3 \rightarrow R-COOH$                         | $-CH_4+O_2$            | +15.9949  |
| $R-CH_2CH_2 \rightarrow R-CH-(OH)_2$                    | $-CH_2+O_2$            | +17.9741  |
| $R-CH=CH-R \rightarrow R-CH_2-CHOH-R'$                  | $+H_2O$                | +18.0106  |
| $R-H \rightarrow R-O-CH_3$                              | $+CH_2O$               | +30.0105  |
| $R-CH=CH-R' \rightarrow R-CH(OH)-CH(OH)-R'$             | $+H_2O_2$              | +34.0054  |
| $R-NH_2 \rightarrow R-NHCOCH_3$                         | $+C_2H_2O$             | +42.0106  |
| $R-COOH \rightarrow R-CONHCH_2COOH$                     | $+C_2H_3NO$            | +57.0215  |
| $R-OH \rightarrow R-OSO_3H$                             | $+SO_3$                | +79.9568  |
| $R-H \rightarrow R-OSO_3H$                              | $+SO_4$                | +95.9517  |
| $R-COOH \rightarrow R-CONH-CH(CH_2SH)-COOH$             | $+C_3H_5NOS$           | +103.0092 |
| $R-COOH \rightarrow R-CONH-CH_2CH_2SO_3H$               | $+C_2H_5NO_2S$         | +107.0041 |
| $R-CH_2-R' \rightarrow RR'-CH-SCH_2CH(NH_2)-COOH$       | $+C_3H_5NO_2S$         | +119.0041 |
| $R-COOH \rightarrow R-CO-SCH_2CH(NHCOCH_3)COOH-CO$      | $+C_5H_7NO_2S$         | +145.0198 |
| $R-COOH \rightarrow R-C_6H_8O_6$                        | $+C_5H_8O_5$           | +148.0372 |
| $RR'-CH_2 \rightarrow RR'-CH-SCH_2CH(NHCOCH_3)-COOH$    | $+C_5H_7NO_3S$         | +161.0147 |
| $R-OH \rightarrow R-O-C_6H_{11}O_5$                     | $+C_6H_{10}O_5$        | +162.0528 |
| $R-OH \rightarrow R-O-C_6H_9O_6$                        | $+C_6H_8O_6$           | +176.0321 |
| $R-H \rightarrow R-O-C_6H_9O_6$                         | $+C_6H_8O_7$           | +192.0270 |
| $R-COOH \rightarrow R-CO-GSH$                           | $+C_{10}H_{15}N_3O_6S$ | +305.6820 |

---

**Table S3.** Summary of HTF metabolites based on DMC

| Metabolites Cluster   | Identification/Reactions                | Metabolites Number |
|-----------------------|-----------------------------------------|--------------------|
| Prototype drug        | 5-hydroxy-6,7,3',4'-tetramethoxyflavone | M0                 |
| Prototype drug isomer | 5-hydroxy-6,7,3',4'-tetramethoxyflavone | M9-M10             |
|                       | Demethylation                           | M5-M7              |
|                       | Flavanone Formation                     | M14-M15            |
|                       | Sulfate-Conjugation                     | M72                |
| Primary cluster       | Methylation                             | M20-M23            |
|                       | Methoxylation                           | M38-M50            |
|                       | Glucuronide Conjugation                 | M78                |
|                       | Oxidation                               | M24-M30            |
| Secondary cluster     | Demethylation                           | M11                |
|                       | Oxidation                               |                    |
|                       | Di-demethylation                        | M1-M4              |
|                       | Flavanone Formation                     | M8                 |
|                       | Demethylation                           |                    |
|                       | Flavanone Formation                     | M32-M33            |
|                       | Oxidation                               |                    |
|                       | Flavanone Formation                     | M67-M68            |
|                       | Di-Oxidation                            |                    |
|                       | Flavanone Formation                     | M31                |
|                       | Methylation                             |                    |
|                       | Flavanone Formation                     | M51-M53            |
|                       | Methoxylation                           |                    |
|                       | Sulfate Conjugation                     | M73                |
|                       | Methoxylation                           |                    |
|                       | Methylation                             | M69-M71            |
|                       | Methoxylation                           |                    |
| Methoxylation         | M12-M13                                 |                    |
| Decarbonylation       |                                         |                    |
| Methoxylation         | M54-M60                                 |                    |
| Chalcone Formation    |                                         |                    |
| Chalcone Formation    | M66                                     |                    |
| Di-Oxidation          |                                         |                    |

|                  |                         |           |         |
|------------------|-------------------------|-----------|---------|
|                  | Chalcone Formation      |           | M34-M37 |
|                  | Oxidation               |           |         |
|                  | Glucuronid Conjugation  | Oxidation | M80-M81 |
|                  | Glucuronid Conjugation  |           | M83-M86 |
|                  | Methoxylation           |           |         |
|                  | Glucuronide Conjugation |           | M79     |
|                  | Flavanone Formation     |           |         |
|                  | Glucuronide Conjugation |           | M77     |
|                  | Demethylation           |           |         |
|                  | Flavanone Formation     |           |         |
|                  | Demethylation           |           | M16-M19 |
|                  | Oxidation               |           |         |
|                  | Flavanone Formation     |           |         |
|                  | Methoxylation           |           | M74-M76 |
| Tertiary primary | Sulfate-Conjugation     |           |         |
|                  | Di-methoxylation        |           | M61-M65 |
|                  | Decarbonylation         |           |         |
|                  | Glucuronide Conjugation |           |         |
|                  | Flavanone Formation     |           | M82     |
|                  | Oxidation               |           |         |

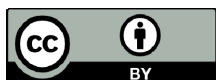

© 2019 by the authors. Submitted for possible open access publication under the terms and conditions of the Creative Commons Attribution (CC BY) license (<http://creativecommons.org/licenses/by/4.0/>).
